# Supplementary material
Source: PubMed Central journal article supplement (PMC4265225)
Supplement: 11606_2014_3049_MOESM1_ESM.pdf [file 11606_2014_3049_MOESM1_ESM.pdf]

## Interview Questions

### CURRENT

#### Own records

1. Do you have a system for keeping track of your medical records?
2. What is it? How do you keep track?
3. What sorts of medical records do you have? What form are they in?
- 3b. Have you ever used a Personal Health Record system ? Why not?
4. Do you like the system you have. Does it work well? What does and doesn't work about it?
5. Do you share the records with anyone? Who else can access those records?
6. Do you have concerns about privacy of your own records?
7. Would you like to be able to share your records more easily (e.g. between physicians), or be able to control who views them?
8. How do you get information from one doctor to another?

#### Records with doctor

1. Have you ever seen your doctor's medical records?

2. What form are they in? How are they stored?

3. Do you know what is in your records? Or, what do you think is in your records?

4. How far back do you think they go?

5. What do you think is **not** in the records?

7. Do you have access your doctor's medical records?

8. Who has access to those records?

9. Do you have concerns about privacy of the records in doctors' offices? (.. also, internet vs not on internet)

10. Do you wish you had access to your Medical Record?

11. Would you like others to have access? Who else would you give access to? Why?

(e.g. family, new physicians, emergency)

12. Would you worry about too much access? (since access -> vulnerability)

13. Would you want to control parts of info - who can see what? What sort of control might you want to have?

14. Do you think EMR help physicians provide better healthcare? How?

15. Would putting access restrictions get in the way of physicians doing their job?

16. Is there info that they would consider sensitive and would not want to share (would want to control access to)? What type of info is sensitive?

17. Would you want to be notified if those sensitive records are accessed?

## **FUTURE**

In an ideal world where anything is possible,

1. What would be in your Medical Record?

2. What would it look like?

3. How would you access it. What would the interface look like? What could you do with it?

4. Who else would have access to it? How would you like sharing handled?

5. What kinds of control would you have over what's in it? Should you be able to change it.

6. Do you have concerns about about keeping the records private? Why?

7. If you had sensitive information in your record (e.g. if you had HIV), how would you like that information to be stored or handled? (How to control access).

8. Would you want old information handled differently than new information?

**In an Emergency**

In case of emergency, who would you like to have access to your medical records?

How much information would you like them to have?

**Other**

If had to choose between an accessible (online) system with possible access for anyone versus a closed system with no access to you, which would you choose?

Do you have a primary physician?

What type of insurance do you have (private vs. medicare)?
